# Supplementary material for: Integrated analysis of DNA methylation and transcriptome profiling of polycystic ovary syndrome
Source: PubMed Central journal article supplement — Mol Med Rep. 2020 Feb 26;21(5):2138–50. doi: 10.3892/mmr.2020.11005 (PMC7115196; doi:10.3892/mmr.2020.11005), 2020-02-26
Supplement: Supplementary_Data.pdf [file Supplementary_Data.pdf]

Table SI. Clinical characteristics of the 10 PCOS cases and 10 healthy controls with matching DNA methylation and gene expression profiling.

| Source no. | Age | Body mass index | Clinical history | Disease |
|------------|-----|-----------------|------------------|---------|
| 90857      | 27  | 34.2            | Obesity          | PCOS    |
| 90966      | 28  | 33.65           | Obesity          | PCOS    |
| 91121      | 26  | 23.8            | Normal           | PCOS    |
| 91140      | 28  | 25.7            | Normal           | PCOS    |
| 91364      | 40  | 30.8            | Obesity          | PCOS    |
| 91410      | 37  | 30.78           | Obesity          | PCOS    |
| 91414      | 45  | 34              | Obesity          | PCOS    |
| 91452      | 27  | 36.2            | Obesity          | PCOS    |
| 91512      | 29  | 33              | Obesity          | PCOS    |
| 91520      | NA  | NA              | NA               | PCOS    |
| 90802      | 27  | 20.2            | Normal           | Normal  |
| 90590      | 25  | 24.1            | Normal           | Normal  |
| 90860      | 26  | 26.6            | Normal           | Normal  |
| 91032      | 30  | 24.2            | Normal           | Normal  |
| 91066      | 32  | 25.6            | Normal           | Normal  |
| 91225      | 31  | 28.5            | Normal           | Normal  |
| 91228      | 27  | 23.8            | Normal           | Normal  |
| 91301      | 30  | 23.1            | Normal           | Normal  |
| 91443      | 34  | 23.3            | Normal           | Normal  |
| 91517      | 28  | 27.8            | Normal           | Normal  |

NA, not available; PCOS, polycystic ovary syndrome.
